# Supplementary material
Source: Springer Nature journal article supplement (https://www.springermedizin.de/resource/supplementary/12943_2002_10_MOESM7_ESM.pdf/9553258)

**PDGFR- $\alpha$**

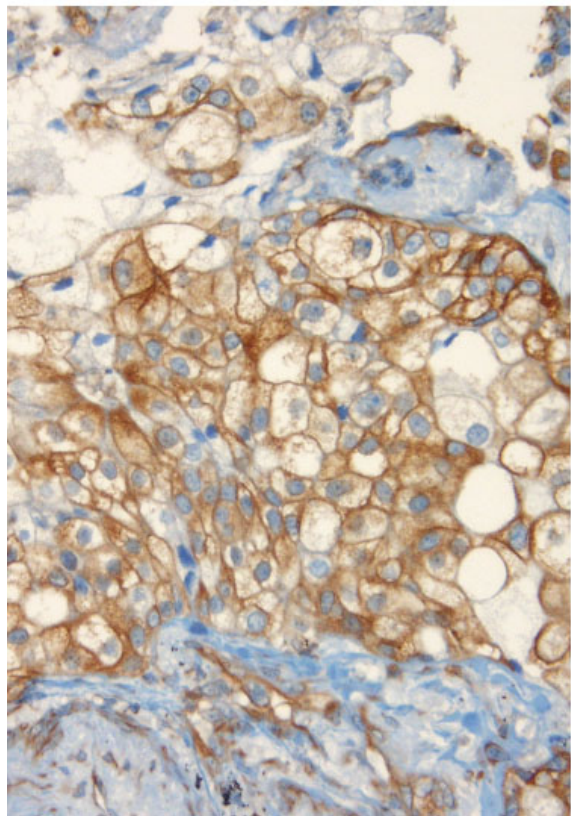

**PDGFR- $\beta$**

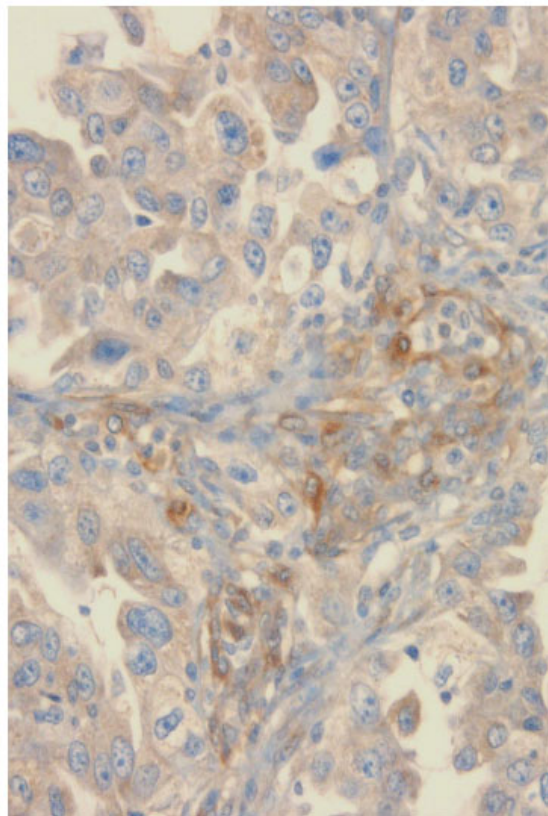

Supplement: MOESM7 [file 9553258]
